# Supplementary material for: Characterization of polar organosulfates in secondary organic aerosol from the unsaturated aldehydes 2- E -pentenal, 2- E -hexenal, and 3- Z -hexenal
Source: Copernicus journal article supplement (doi:10.5194/acp-16-7135-2016), 2016-06-10
Supplement: Supplementary file 1 [file acp-16-7135-2016-supplement.pdf]

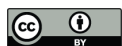

*Supplement of*

**Characterization of polar organosulfates in secondary organic aerosol from the unsaturated aldehydes 2-*E*-pentenal, 2-*E*-hexenal, and 3-*Z*-hexenal**

Mohammad Safi Shalamzari et al.

*Correspondence to:* Magda Claeys (magda.claeys@uantwerpen.be)

The copyright of individual parts of the supplement might differ from the CC-BY 3.0 licence.

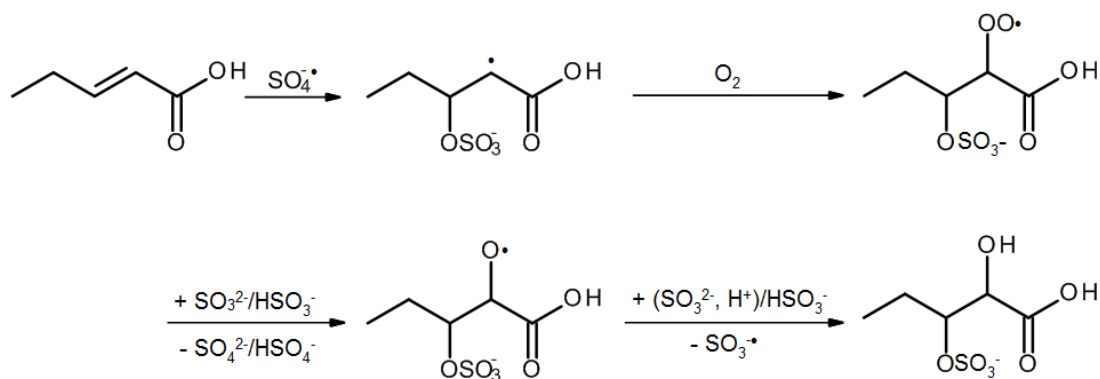

**Scheme S1.** Formation mechanism for 3-sulfoxy-2-hydroxypentanoic acid through reaction of 2-*E*-pentenoic acid with the sulfate radical anion in aqueous solution.

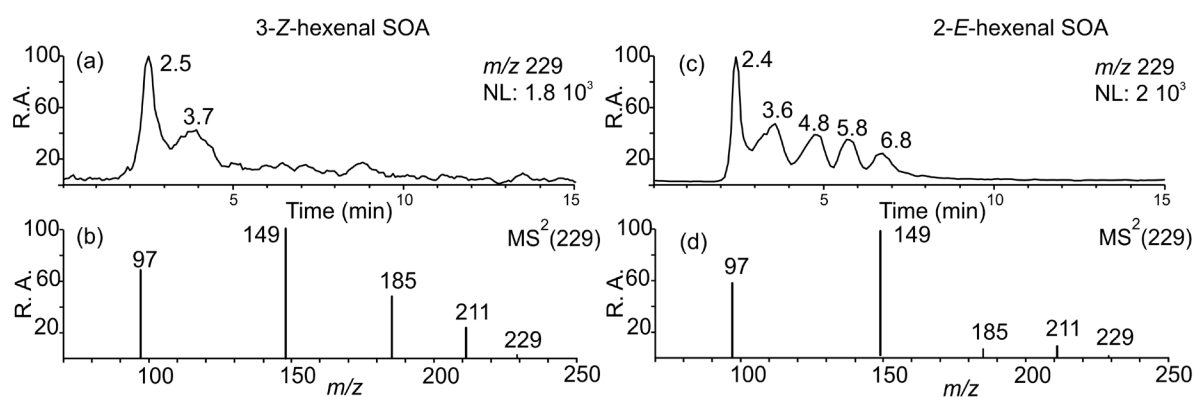

**Figure S1.** Selected LC/MS extracted ion chromatographic data ( $m/z$  229) for the selected filters containing 3-*Z*-hexenal and 2-*E*-hexenal SOA, as well as a  $\text{MS}^2$  product ion spectrum for the peak eluting at 2.5 min and 2.4 min, respectively.

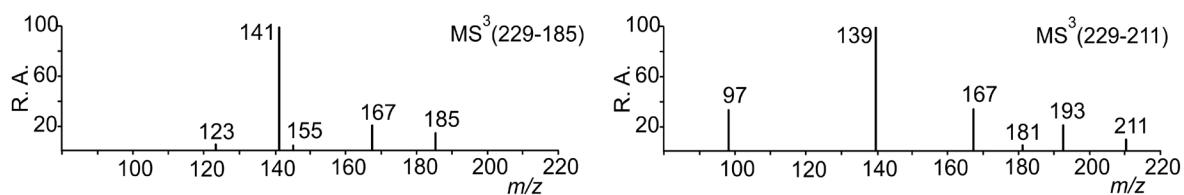

**Figure S2.** Additional  $\text{MS}^3$  product ion data for the peak at 2.5 min present in ambient fine aerosol (Fig. 2a).

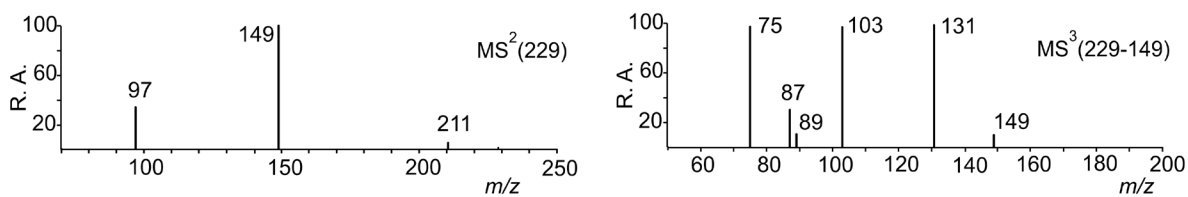

**Figure S3.** Selected MS data ( $MS^2$  or  $MS^3$  product ion spectra) for the peak eluting at 2.2 min in ambient aerosol (Fig. 2a).

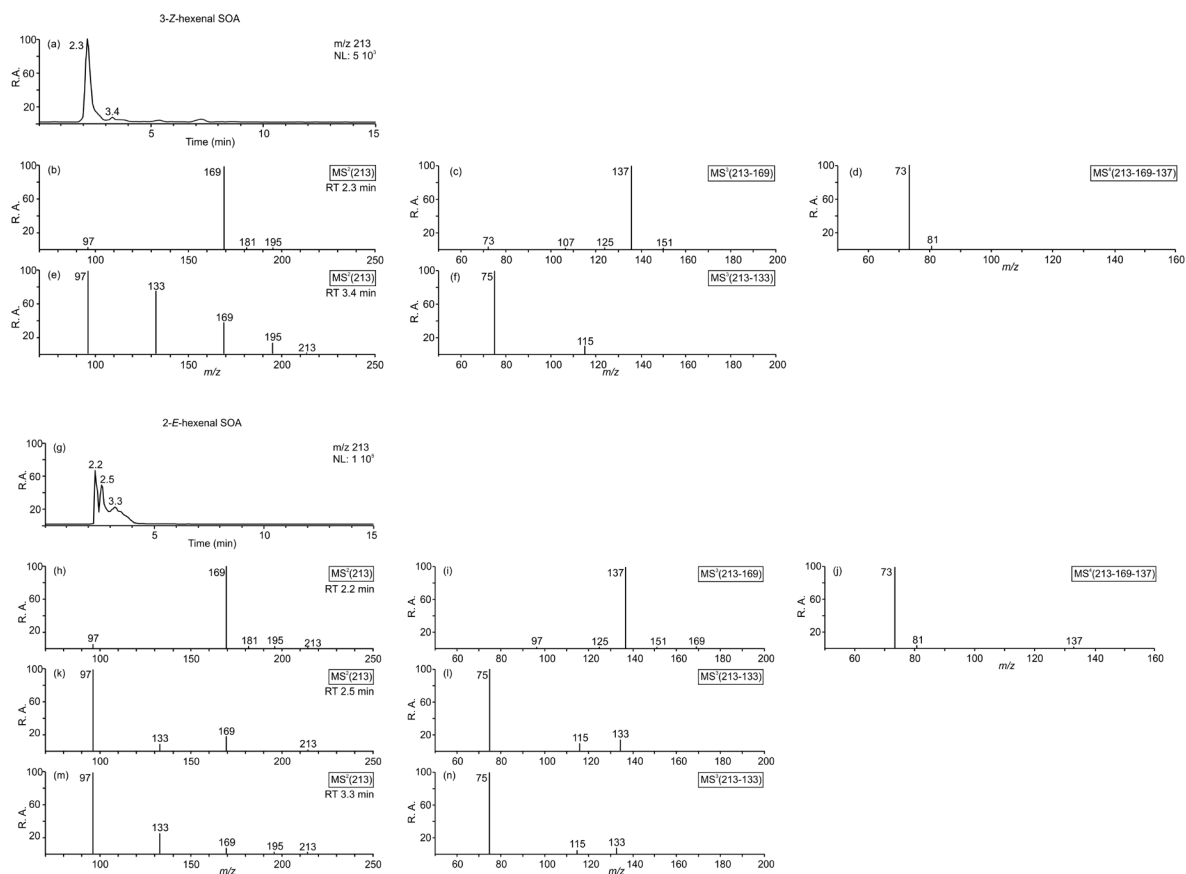

**Figure S4.** Selected LC/MS chromatographic data ( $m/z$  213 EICs) and MS data ( $MS^2$ ,  $MS^3$  and  $MS^4$  product ion spectra) for 3-*Z*-hexenal (a-f) and 2-*E*-hexenal SOA (g-n). Abbreviation: NL, normalization level.

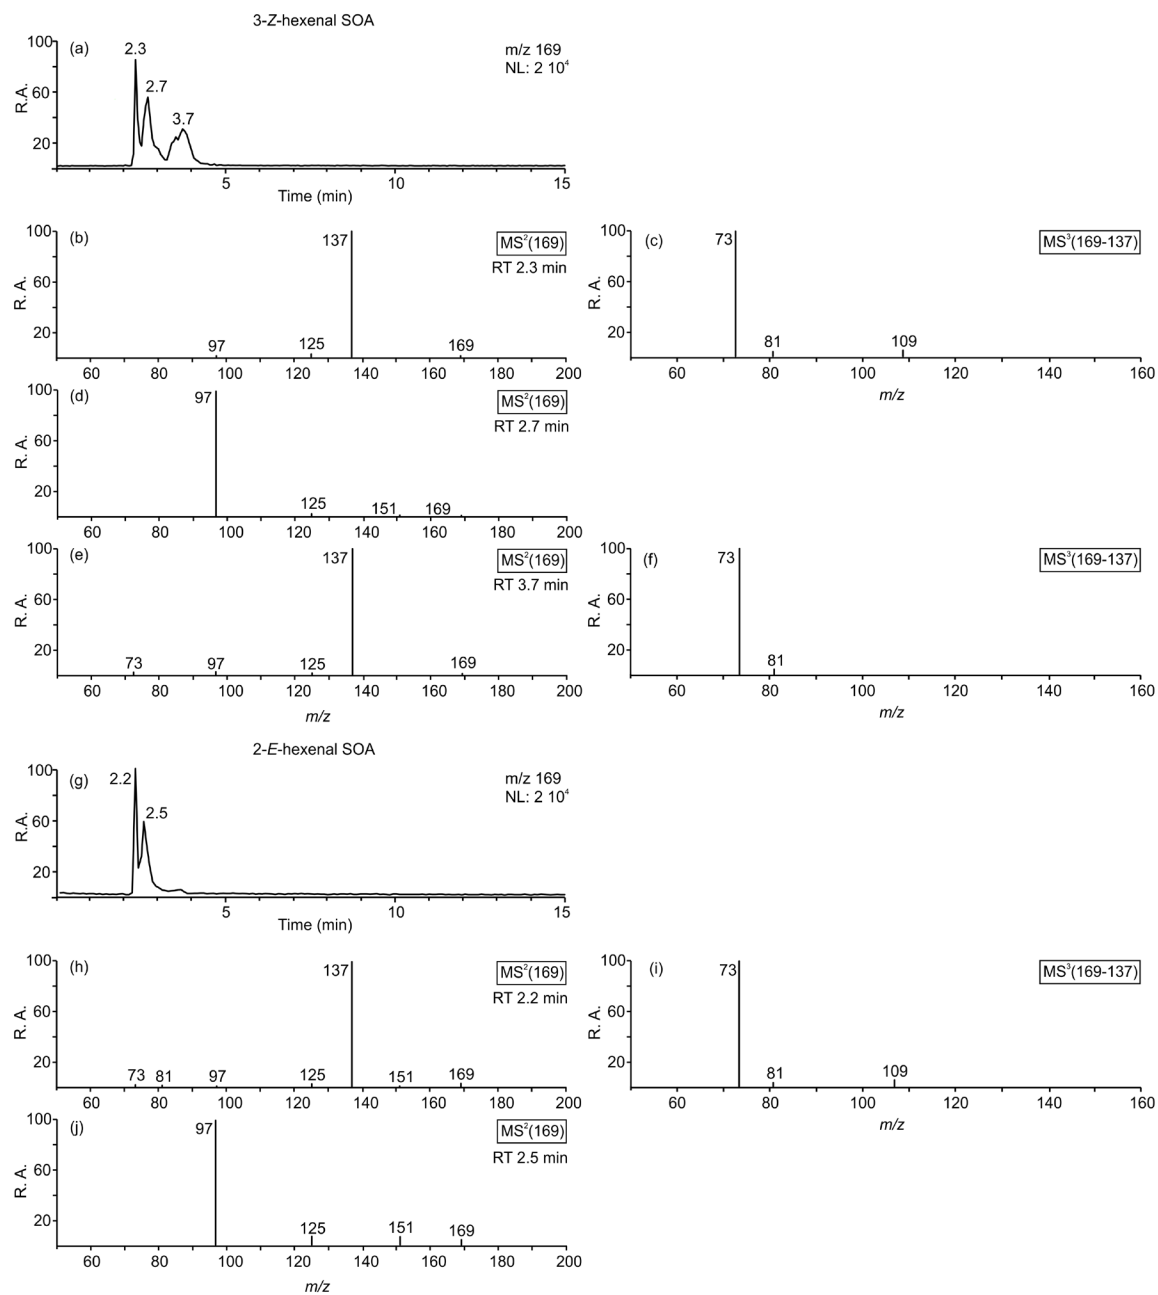

**Figure S5.** Selected LC/MS chromatographic data ( $m/z$  169 EICs) and MS data ( $MS^2$  and  $MS^3$  product ion spectra) for 3-Z-hexenal SOA (a-f), and 2-E-hexenal SOA (g-j). The peak at RT 3.7 min in 2-E-hexenal SOA (g) is minor, but detailed analysis shows that the same  $m/z$  169 compound as in 3-Z-hexenal SOA (a) is present. Abbreviation: NL, normalization level.
